# Supplementary material
Source: MDPI journal article supplement (https://www.mdpi.com/2297-8739/11/3/89)
Supplement: s1 [file s1]

# Supplementary Materials

**Table S1.** Greenness analysis of RP-HPLC method using AGREE

| No. | Green Analytical Chemistry Principle                                                                                             | Value for Green Analytical Chemistry principle                                  | Score |
|-----|----------------------------------------------------------------------------------------------------------------------------------|---------------------------------------------------------------------------------|-------|
| 1   | Direct analytical techniques should be applied to avoid sample treatment.                                                        | external sample pre- and treatment and batch analysis (reduced number of steps) | 0.3   |
| 2   | Minimal sample size and minimal number of samples are goals.                                                                     | 5 mg                                                                            | 1.0   |
| 3   | In situ measurements should be performed.                                                                                        | On-line                                                                         | 0.66  |
| 4   | Integration of analytical processes and operations saves energy and reduces the use of reagents.                                 | 3 or fewer                                                                      | 1.0   |
| 5   | Automated and miniaturized methods should be selected.                                                                           | automated and miniaturized                                                      | 1.0   |
| 6   | Derivatization should be avoided.                                                                                                | No derivatization                                                               | 1.0   |
| 7   | Generation of a large volume of analytical waste should be avoided and proper management of analytical waste should be provided. | 24 mL                                                                           | 0.27  |
| 8   | Multianalyte or multiparameter methods are preferred versus methods using one analyte at a time.                                 | 2 analytes in single run, 3 sample per hour                                     | 0.38  |
| 9   | The use of energy should be minimized.                                                                                           | LC                                                                              | 0.5   |
| 10  | Reagents obtained from renewable source should be preferred.                                                                     | None of the reagents are from bio-based sources                                 | 0     |
| 11  | Toxic reagents should be eliminated or replaced.                                                                                 | 11.3 mL toxic reagents                                                          | 0.19  |
| 12  | The safety of the operator should be increased.                                                                                  | No threats which were not avoided                                               | 1.0   |

**Table S2.** Greenness analysis of RP-HPLC method using GAPI

| Pentagrams       | Field No. | Category                       | Method item                            | Color  |
|------------------|-----------|--------------------------------|----------------------------------------|--------|
| First pentagram  | 1         | Sample collection              | On-line                                | yellow |
|                  | 2         | Sample preservation            | None                                   | green  |
|                  | 3         | Sample transport               | None                                   | green  |
|                  | 4         | Sample storage                 | Under normal conditions                | yellow |
| Second pentagram | 5         | Type of method                 | Simple procedures                      | yellow |
| Third pentagram  | 6         | Scale of extraction            | Micro-extraction                       | yellow |
|                  | 7         | Solvents/reagents used         | Non-green solvents/reagents used       | red    |
|                  | 8         | Additional treatments          | None                                   | green  |
| Fourth pentagram | 9         | Amount of reagents or solvents | 11.3 mL                                | yellow |
|                  | 10        | Health Hazard                  | Moderately toxic                       | yellow |
|                  | 11        | Safety hazard                  | Flammability score 3                   | yellow |
| Fifth pentagram  | 12        | Energy                         | ≤1.5 kWh per sample                    | yellow |
|                  | 13        | Occupational hazard            | Hermetic sealing of analytical process | green  |
|                  | 14        | Waste                          | 24 mL                                  | red    |
|                  | 15        | Waste treatment                | No treatment                           | red    |
